# Supplementary material for: Migration inhibition and selective cytotoxicity of cobalt hydroxide nanosheets on different cancer cell lines
Source: Royal Society of Chemistry journal article supplement (doi:10.1039/d2nj01466a), 2022-01-01
Supplement: d2nj01466a1.pdf [file d2nj01466a1.pdf]

Electronic Supplementary Material (ESI) for New Journal of Chemistry

**Migration inhibition and selective cytotoxicity of cobalt hydroxide nanosheets on different cancer cell lines**

Jiao Yang Lu<sup>1</sup>, Xiaolong Zhou<sup>1</sup>, Jialiang Yang<sup>1,3</sup>, Yi Zhou<sup>1</sup>, Binsheng He<sup>1</sup>, Wei Tao Huang<sup>2</sup>, Yajing Wang<sup>1</sup>, and Zhen Guo<sup>1,\*</sup>

*1. Hunan Key Laboratory of the Research and Development of Novel Pharmaceutical Preparations, Academician Workstation, Changsha Medical University, Changsha 410219, China*

*2. State Key Laboratory of Developmental Biology of Freshwater Fish, Hunan Provincial Key Laboratory of Microbial Molecular Biology, College of Life Science, Hunan Normal University, Changsha 410081, China*

*3. Geneis Beijing Co., Ltd., Beijing 100102, China*

\*Corresponding author:

E-mail: plws3298@163.com. Fax: (+86)731-8860-2602; Tel: (+86)731-8860-2602

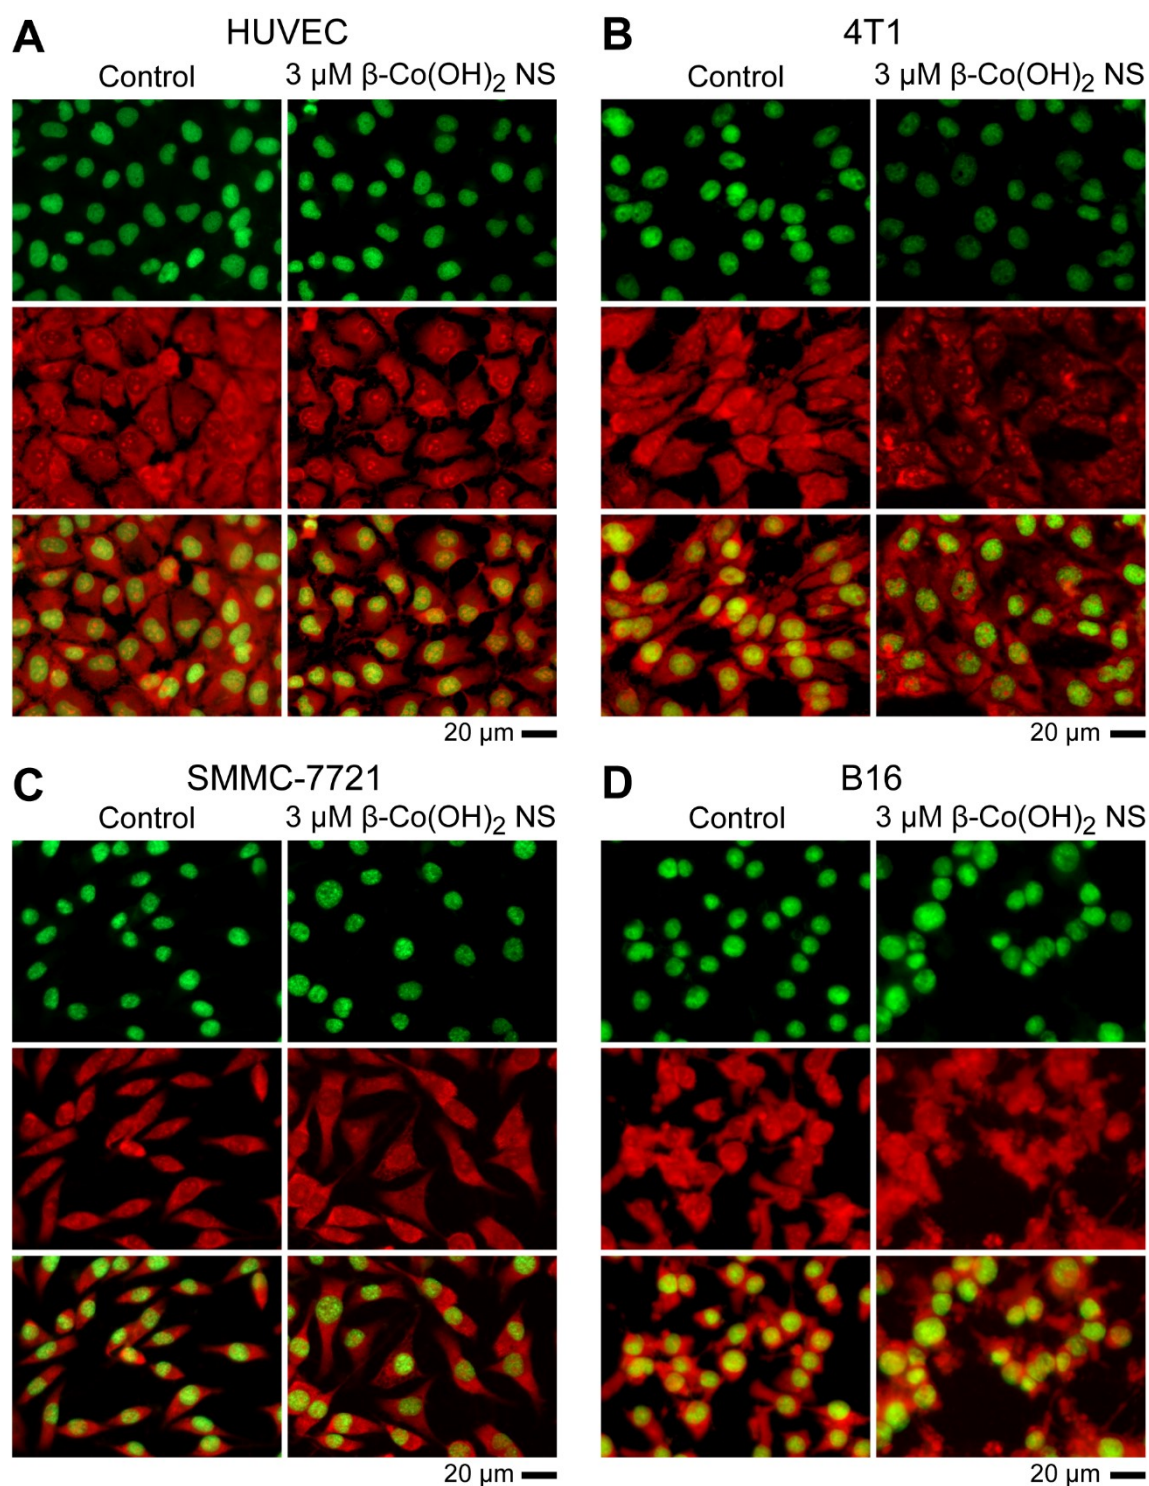

**Figure S1.** Representative micrographs taken from normal cells HUVEC (A) and various cancer cells (B-D for 4T1, SMMC-7721, B16) stained with AO (red and green). AO images were acquired with a single excitation laser (488 nm) while capturing green (490–550 nm) and red (580–750 nm) wavelength ranges after treatment with  $\beta\text{-Co(OH)}_2$  NS (3  $\mu\text{M}$ ) for 24 h. Scale bar: 20  $\mu\text{m}$ .

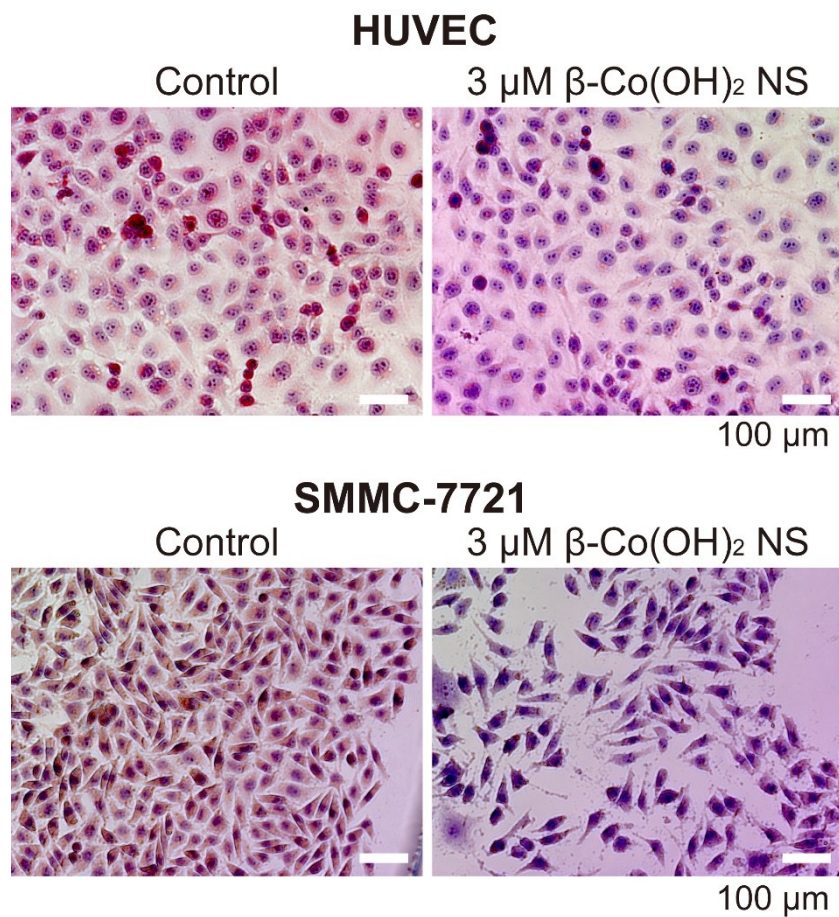

**Figure S2.** Morphological analysis by haematoxylin-eosin staining of HUVEC and SMMC-7721 cells before and after exposure to  $\beta\text{-Co(OH)}_2$  NS (3  $\mu\text{M}$ ) for 24 h. Scale bar, 100  $\mu\text{m}$ .

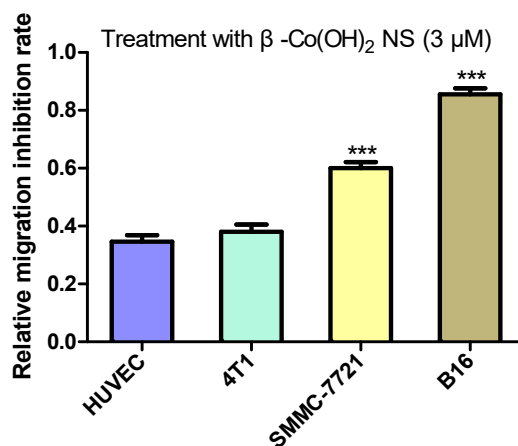

**Figure S3.** Quantification of relative migration inhibition rate of HUVEC, 4T1, SMMC-7721, and B16 cells before and after exposure to  $\beta\text{-Co(OH)}_2$  NS (3  $\mu\text{M}$ ) for 24 h. Mean values and standard deviation were calculated from 3 independent experiments. \*\*\* $p < 0.0001$ .
